## **Characteristics of head and neck alignment and function of deep cervical flexor muscles in patients with nonspecific neck pain**

### **Authors**

\*Tomoko Kawasaki, MS,<sup>1,2,3,4</sup> Shunsuke Ohji, PhD,<sup>3</sup> Junya Aizawa, PhD,<sup>5</sup> Tomoko Sakai, MD, PhD,<sup>1</sup> Kenji Hirohata, MS,<sup>1,3</sup> Taiichi Koseki, PhD,<sup>6</sup> Hironobu Kuruma, PhD,<sup>4</sup> Atsushi Okawa, MD, PhD,<sup>1</sup> and Tetsuya Jinno, MD, PhD<sup>1,7</sup>

1. Department of Rehabilitation Medicine, Graduate School of Medical and Dental Science, Tokyo Medical and Dental University, Tokyo, Japan.
2. Department of Rehabilitation, Hiro-o Orthopedics Clinic, Tokyo, Japan.
3. Clinical Center for Sports Medicine and Sports Dentistry, Tokyo Medical and Dental University, Tokyo, Japan.
4. Division of Physical Therapy, Tokyo Metropolitan University, Tokyo, Japan.
5. Department of Physical Therapy, Faculty of Health Science, Juntendo University, Tokyo, Japan.
6. Department of Rehabilitation, Sasaki Orthopedic Clinic, Kanagawa, Japan.
7. Department of Orthopaedic Surgery, Dokkyo Medical University Saitama Medical Center, Saitama, Japan.

## **Abstract**

**Objective:** To compare forward head posture (FHP) in natural and corrected head postures between patients with nonspecific neck pain (NSNP) and controls, and to clarify the relationship between natural- and corrected-head posture angle differences and deep cervical flexor function.

**Design:** Survey study

**Setting:** Patients with NSNP were outpatients at an orthopedic clinic; the controls were community volunteers.

**Participants:** Thirty-eight patients were divided into the NSNP and control groups (n=19 each), including patients reporting a numerical rating pain score of 3-7 for at least 3 months and those with no neck pain within 12 months previously, respectively.

**Interventions:** To evaluate FHP, the cranial rotation and vertical angles were measured using lateral photographs of the head and neck. The craniocervical flexion test was used to evaluate deep cervical flexor activation and endurance.

**Main outcome measures:** We evaluated the head and neck alignment in natural and corrected head postures and the relationship between the degree of change and deep cervical flexor function.

**Results:** The FHP in the natural head posture did not differ significantly between the groups. For corrected head posture, the FHP was significantly smaller in the NSNP group than in the control group. In the NSNP group, the cranial rotation and vertical angles were significantly different between natural and corrected head postures, and the angle difference between these postures was significantly correlated with deep cervical flexor function.

**Conclusions:** In patients with NSNP, hypercorrection in the corrected head posture was shown and may be correlated with dysfunction of the deep cervical flexors. Further investigation into

the causal relationship between hypercorrection, deep neck flexor dysfunction, and neck pain is required.

## **Keywords**

Neck pain, Posture, outpatients

## **List of Abbreviations**

BMI: body mass index

CCFT: craniocervical flexion test

CRA: cranial rotation angle

CVA: cranial vertical angle

FHP: forward head posture

ICC: intraclass correlation coefficient

NRS: numerical rating scale

NSNP: nonspecific neck pain

PI: performance index

Approximately 70% of the global population will experience nonspecific neck pain (NSNP) at some time in their lives.<sup>1</sup> NSNP is a social issue as it places a large burden on healthcare systems and results in a loss of productivity.<sup>2,3</sup> To improve this, it is necessary to clarify the factors related to NSNP.

One factor known to be related to NSNP is head and neck malalignment in the sagittal plane, particularly forward head posture (FHP). A cross-sectional study that measured head posture in the sagittal plane found a correlation between FHP and neck pain intensity.<sup>4</sup> In systematic reviews that investigated the relationship between neck pain and FHP, some reported that the occurrence of FHP as the natural head posture was different between patients with neck pain and the control groups.<sup>5</sup> In contrast, others reported that there was no difference between the two groups.<sup>6</sup> Even though these studies considered FHP as a relevant factor associated with NSNP, no consensus has been reached.

The characteristics of head and neck alignment among patients with NSNP may not be easily detected by simply analyzing the natural head posture. A systematic review on proprioceptive dysfunction in patients with neck pain found that joint positional error in the neck is related to neck pain.<sup>7</sup> Another study found that measurement of cervical joint positional proprioception in the horizontal and sagittal planes resulted in significant errors during head repositioning among those with neck pain compared to those without.<sup>8</sup> These studies suggest that the characteristics of head and neck alignment in patients with NSNP may be better understood by not only evaluating natural head posture but also considering alignment during a task involving corrected head posture. No previous study has measured head and neck alignment in natural and corrected head

postures and simultaneously analyzed these characteristics in patients with NSNP.

In clinical settings, hypercorrection is frequently observed in patients with NSNP when instructed to correct their head posture. For this reason, the deep cervical flexors may be dysfunctional in these patients. A study of the relationships between FHP, using x-ray images, and neck muscle function among college students reported a negative correlation between FHP and endurance of the deep cervical flexors.<sup>9</sup> Patients with NSNP frequently present with dysfunction of the deep cervical flexors,<sup>10,11</sup> which tends to lead to compensatory activation of the surface muscles of the neck.<sup>10-12</sup> These studies suggest that in patients with NSNP, the functional impairment of the deep cervical flexors, which contribute to the correction of FHP, may lead to compensatory activity of the surface muscles of the neck, causing hypercorrection. However, the relationship between the corrected head posture and the function of the deep cervical flexors is unclear.

Therefore, this study aimed to compare the extent of FHP in natural and corrected head postures between the NSNP and control groups and clarify the relationship between the angle difference (corrected - natural) and the function of the deep cervical flexors. We hypothesized that: there are no differences in FHP in the natural head posture between the NSNP and control groups, the corrected head position results in less FHP and further change from the natural head posture in the NSNP group compared to the control group, and there is a relationship between the angle difference between natural and corrected head postures and the function of the deep cervical flexors.

## **Methods**

### ***Procedures***

This was a survey study. Participant demographics and pain intensity scores were collected using a self-descriptive questionnaire. Lateral head and neck photographs were taken, and the deep cervical flexors functions were assessed using the craniocervical flexion test (CCFT). All participants provided written informed consent before initiation of the study. This study was approved by the university's Institutional Review Board (approval no. M2019-040).

### ***Participants***

We defined the participant groups as follows: the NSNP group and control group. Inclusion criteria for the patients in the NSNP group were those who were examined at an orthopedic clinic due to neck pain and reported a pain score on the numerical rating scale (NRS) of 3-7, for at least 3 months.<sup>13-15</sup> The control group included individuals who reported no neck pain (NRS 0) in the 12-month period prior to the measurement.<sup>14</sup> The exclusion criteria were as follows: history of diseases of the spine, rheumatoid arthritis, previous spine surgery, pain symptoms in the neck or shoulder area, and pregnancy. Patients in the NSNP group were recruited from outpatients attending a single orthopedic clinic. Participants in the control group were recruited from volunteers; recruitment was conducted by poster advertisement. The sample size was calculated using G\*Power<sup>16</sup> based on data from similar previous studies,<sup>4,17,18</sup> with a minimum sample size of 19 in each group for a total of 38 (effect size (d) = 0.96; alpha = 0.05; power = 0.8; two-tailed).

### ***Evaluation of Pain Intensity***

The intensity of neck pain was measured using the NRS.<sup>19</sup> The average intensity of pain experienced during the week before the study was measured using a self-descriptive questionnaire.<sup>20</sup> The inter-rater reliabilities of this method were high (intraclass correlation coefficient [ICC] = 0.76).<sup>21</sup>

### ***Measurement of Head and Neck Angles***

To measure FHP, lateral head and neck photographs of the participants were taken. Participants were seated with the head and trunk in the upright position and asked to gaze forward; the height of the chair was 40 cm. The arms were extended, and the hands were placed on either side of the body. The measurement task involved the participant seated with voluntary natural head posture (Figure 1a) followed by corrected head posture (Figure 1b). The corrected head posture was the position where the participant felt that the head was positioned directly above the trunk. Lateral photographs of the head and neck were taken using a digital video camera (HDR-CX720V; Sony Corp., Tokyo, Japan). The distance between the camera lens and the participant was 300 cm.<sup>22,23</sup> The height of the camera lens was adjusted to the level of the lateral canthus of the participant, and the lateral canthus was captured in the center of the image. Photographs were taken once in the natural head posture and the corrected head posture, respectively.

### ***Photographic Analysis***

To evaluate FHP, the cranial rotation angle (CRA) and cranial vertical angle (CVA) were measured using the lateral photographs (Figure 2).<sup>9</sup> The CRA was determined by measuring the angle between the line connecting C7 with the tragus of the ear and the line connecting the tragus

of the ear with the lateral canthus of the eye.<sup>24</sup> The CVA was calculated by measuring the angle between the line connecting C7 with the tragus of the ear and the horizontal line.<sup>24</sup> The intra- and inter-rater reliabilities of these methods were high (ICC = 0.86-0.96).<sup>25-27</sup> Each photograph was measured by the same physical therapist, who specialized in orthopedic rehabilitation for 12 years, using ImageJ software (National Institutes of Health, Bethesda, Maryland, USA).

### ***Craniocervical Flexion Test (CCFT)***

The CCFT<sup>28, 29</sup> was used to evaluate the activation and endurance of the deep cervical flexors. In the supine position, a sphygmomanometer cuff was placed behind the participant's neck in a position where it abutted the occiput. It was then inflated to a stable baseline pressure of 20 mmHg, which is the standard pressure sufficient to fill the space between the testing surface and neck (Figure 3). The movement was performed gently and slowly as a head nodding action (as if saying "yes") for five incremental increasing stages; 2 mmHg progressive pressure increases from the baseline of 20 mmHg to a maximum of 30 mmHg, with each stage being held for 10 seconds. The CCFT was performed through two phases; in the first phase, we measured the maximum pressure the participant could hold for 10 seconds with upper cervical flexion, and this was used as the activation pressure score. Next, the number of times the participant could repeat the 10 second holding exercise (up to a maximum of 10 times) was recorded, and the activation pressure score was set as the target pressure. The performance pressure index was calculated by multiplying the activation pressure score by the number of successful repetitions as the endurance of the deep cervical flexors. During CCFT, the deep cervical flexors, especially the longus colli and longus capitis muscle, are activated, and the electromyogram amplitude increases with each stage of the test.<sup>30,31</sup> The inter-rater reliability of this method was high (ICC



= 0.81-0.93).<sup>11,29</sup>

### ***Calculated Data***

The CRA and CVA in the natural and corrected head postures, measured using ImageJ in lateral photographs, were used for the analysis. The activation pressure score and (performance index) PI measured by CCFT were also analyzed. The angle difference between natural and corrected head postures of CRA and CVA (corrected - natural = Difference-CRA, Difference-CVA) was also calculated.

### ***Statistical Analysis***

The normality of each variable was confirmed using the Shapiro–Wilk test. Normally distributed data were summarized as mean and standard deviations and analyzed using the *t*-test or Pearson’s correlation coefficient. Non-normally distributed data were summarized as medians and interquartile ranges and analyzed using the Wilcoxon signed-rank test, Mann–Whitney U test, or Spearman’s rank correlation coefficient. CRA and CVA in natural and corrected head postures and PI were compared between the NSNP and control groups using the unpaired *t*-test. For the comparison of activation pressure scores between the NSNP and control groups, the Mann–Whitney U test was used. Inter-group comparisons of CRA and CVA between natural and corrected head postures were analyzed using the paired *t*-test. The relationship between the difference-CRA or difference-CVA and activation pressure score or PI was analyzed using Spearman's rank correlation coefficient.

All data were analyzed using SPSS (version 21.0; IBM Corp, Armonk, NY, USA). Statistical

significance was set at  $P < 0.05$ . The effect size ( $t$ -test =  $d$ ; Wilcoxon's signed rank test, Mann–Whitney =  $r$ ) was calculated for each variable.

## Results

A total of 38 participants completed the measurement: nineteen patients with NSNP and nineteen controls were included in the study (Table 1). There were no significant differences in CRA and CVA in the natural head posture between the NSNP and control groups ( $P = 0.39$ ,  $d = 0.29$ ;  $P = 0.86$ ,  $d = 0.06$ ) (Table 2). The CRA in the corrected head posture was significantly smaller in the NSNP group than in the control group ( $P < 0.05$ ,  $d = 1.00$ ) (Table 2). The CVA in the corrected head posture was significantly larger in the NSNP group than in the control group ( $P < 0.01$ ,  $d = 1.08$ ) (Table 2). In the NSNP group, there was a significant difference in the CRA and CVA between natural and corrected head postures ( $P < 0.01$ ,  $d = 1.05$ ;  $P < 0.01$ ,  $d = 1.39$ ) (Table 3). In contrast, there was no significant difference in the control group in CRA and CVA between natural and corrected head postures ( $P = 0.70$ ,  $d = 0.05$ ;  $P = 0.08$ ,  $d = 0.28$ ) (Table 3). The activation pressure score and PI were significantly lower in the NSNP group than in the control group ( $P < 0.05$   $r = -0.39$ ;  $P < 0.01$ ,  $d = 1.03$ ) (Table 4). In the NSNP group, the difference-CRA and activation pressure score or PI had a significant positive correlation ( $\rho = 0.60$ ,  $P < 0.01$ ;  $\rho = 0.76$ ,  $P < 0.01$ ), and the difference-CVA and activation pressure score had a significant negative correlation ( $\rho = -0.54$ ,  $P < 0.05$ ) (Table 5).

## Discussion

We compared CRA and CVA in natural and corrected head postures between patients with NSNP and controls. In the natural head posture, there was no difference in CRA and CVA between the NSNP and control groups. In the NSNP group, the CRA in the corrected head posture was smaller, the CVA was larger, and the angle difference between natural and corrected head postures was bigger than in the control group. We also found relationships between the angle differences between natural and corrected head postures and the function of the deep cervical flexors in the NSNP group. The results of this study support our hypothesis.

In the natural head position, there was no difference in the CRA and CVA between the NSNP and control groups. In the corrected head position, CRA was smaller and CVA larger in the NSNP group than in the control group. Goniometric measurements of the CVA during standing in patients with neck pain and healthy participants showed no differences between the two groups.<sup>18</sup> In contrast, a study of head and neck alignment with a simulated computer workstation in patients with neck pain and healthy controls, using photographs taken by a digital camera, showed that the CVA of the neck pain group was significantly smaller than that of the healthy controls.<sup>32</sup> While comparing head and neck alignment in the natural head posture between the NSNP and control groups, previous study results are conflicting regarding the difference between the groups; this may be influenced by the measurement environment and the task performed. No previous studies have compared head and neck alignment in the corrected head postures between patients with NSNP and healthy controls. The results of this study suggest that differences in head and neck alignment between patients with NSNP and healthy controls are characterized in the corrected head posture. Therefore, when evaluating the characteristics of head and neck alignment of patients with NSNP, it is better to observe not only the natural head posture but also

corrected head posture.

The head and neck alignment of the NSNP group showed no difference in the natural head posture compared to the control group, but there was a significant difference in the corrected head posture; the angle difference between natural and corrected head postures was larger. A study involving measurement of the head and neck alignment in the natural head posture in healthy participants showed the CRA was  $148.9 (8.7)^\circ$  and the CVA was  $50.9 (3.8)^\circ$ .<sup>33</sup> A study measuring natural head posture using a digital camera in healthy participants reported the CVA as  $50.4 \pm 5.2^\circ$ .<sup>34</sup> In the corrected head and neck alignment (CRA:  $149.7 \pm 5.5^\circ$ , CVA:  $50.6 \pm 4.5^\circ$ ) of the NSNP group in this study, the CRA was smaller and CVA larger than those in previously reported healthy data. The CRA is reduced by flexion of the upper cervical spine, while the CVA is increased by extension of the middle-lower cervical spine; these combined movements lead to a retracted head posture.<sup>33</sup> Collectively, these findings suggest that patients with NSNP have a larger degree of flexion of the upper cervical spine and extension of the middle-lower cervical spine in the corrected head position from the natural head posture, showing a hypercorrected head posture compared to control groups.

One factor leading to hypercorrection of head and neck alignment in patients with NSNP may be dysfunction of the deep cervical flexors. This study showed a correlation between the angle difference between natural and corrected head postures and the function of the deep cervical flexors in the NSNP group. Comparing the function of the deep cervical flexors using the CCFT in patients with cervical pain and healthy controls, Juul et al. reported that activation pressure scores and PI were significantly lower in the cervical pain patient group.<sup>10,11</sup> In patients with

NSNP, the surface muscles tend to compensate for the dysfunction of the deep cervical flexors with upper cervical flexion.<sup>12</sup> The surface muscles have longer moment arms than the deep muscles and are poorly adapted to segmental and micro-movements.<sup>35</sup> Thus, dysfunction of the deep cervical flexors may lead to hypercorrection in the corrected head posture.

The characteristic head and neck alignment of patients with NSNP may not be accurately detected by evaluating natural head posture only. It is necessary to also observe the corrected head posture when evaluating the head and neck alignment of patients with NSNP in the sitting position. The corrected head posture of patients with NSNP is likely to hypercorrect posteriorly, related to dysfunction of the deep cervical flexors. If hypercorrection of the posture is observed in patients with NSNP, treatment might be aimed at improving the head posture and function of the deep cervical flexors to reduce neck pain. Evaluating the corrected head posture and the function of the deep cervical flexors may be valuable in instructing patients with NSNP to attempt and correct their head posture, which might ultimately aid in reducing their pain.

### **Study Limitations**

This study has several limitations. Because of the unequal ratios of male and female participants in both groups, the effect of sex is not known. Women are at higher risk for NSNP<sup>36</sup> and have larger FHP than men,<sup>23</sup> but the causal relationship is unknown. We did not measure factors such as muscle activity during the head correction exercise, and the mechanism of hypercorrection in the NSNP group is uncertain. In addition, the relationship between neck pain and hypercorrection in the corrected head posture is unknown. Further studies may clarify the cause of

hypercorrection in patients with NSNP by measuring muscle activity during head correction, and a cohort study of patients with NSNP to establish a causal relationship between hypercorrection, dysfunction of the deep neck flexors, and neck pain.

## **Conclusions**

The head and neck alignment in natural and corrected head postures were compared in patients with NSNP and controls, and the relationship between the degree of change and the function of the deep cervical flexors was analyzed. Hypercorrection in the corrected head posture was shown among patients with NSNP; this may be correlated with dysfunction of the deep cervical flexors, and clinicians should consider this when treating these patients.

## References

1. Childs JD, Cleland JA, Elliott JM, Teyhen DS, Wainner RS, Whitman JM, Sopky BJ, Godges JJ, Flynn TW; American Physical Therapy Association. Neck pain: Clinical practice guidelines linked to the international classification of functioning, disability, and health from the Orthopedic section of the American Physical Therapy Association. *J Orthop Sports Phys Ther* 2008;38:A1–34. doi: 10.2519/jospt.2008.0303.
2. Nagata T, Mori K, Ohtani M, Nagata M, Kajiki S, Fujino Y, Matsuda S, Loeppke R. Total health-related costs due to absenteeism, presenteeism, and medical and pharmaceutical expenses in Japanese employers. *J Occup Environ Med* 2018;60:e273–80. doi: 10.1097/JOM.0000000000001291.
3. Gaskin DJ, Richard P. The economic costs of pain in the United States. *J Pain* 2012;13:715–24. doi: 10.1016/j.jpain.2012.03.009.
4. Yip CHT, Chiu TTW, Poon ATK. The relationship between head posture and severity and disability of patients with neck pain. *Manual Therapy* 2008;13:148–54. doi: 10.1016/j.math.2006.11.002.
5. Mahmoud NF, Hassan KA, Abdelmajeed SF, Moustafa IM, Silva AG. The relationship between forward head posture and neck pain: a systematic review and meta-analysis. *Curr Rev Musculoskelet Med* 2019;12:562–77. doi: 10.1007/s12178-019-09594-y.
6. Silva AG, Sharples P, Johnson MI. Studies comparing surrogate measures for head posture in individuals with and without neck pain. *Phys Ther Rev* 2010;15:12–22. doi: 10.1179/174328810X12647087218631.
7. de Vries J, Ischebeck BK, Voogt LP, van der Geest JN, Janssen M, Frens MA, Kleinrensink GJ. Joint position sense error in people with neck pain: A systematic review. *Man Ther* 2015;20:736–44. doi: 10.1016/j.math.2015.04.015.
8. Revel M, Andre-Deshays C, Minguet M. Cervicocephalic kinesthetic sensibility in patients with cervical pain. *Arch Phys Med Rehabil* 1991;72:288–91. doi: 10.5555/uri:pii:000399939190243C.
9. Gong W, Kim C, Lee Y. Correlations between cervical lordosis, forward head posture, cervical ROM and the strength and endurance of the deep neck flexor muscles in college students. *J Phys Ther Sci* 2012;24:275–7. doi: 10.1589/jpts.24.275.
10. Juul T, Langberg H, Enoch F, Sjøgaard K. The intra- and inter-rater reliability of five clinical muscle performance tests in patients with and without neck pain. *BMC Musculoskelet Disord* 2013;14:339. doi: 10.1186/1471-2474-14-339.
11. Jull G, Barrett C, Magee R, Ho P. Further clinical clarification of the muscle dysfunction in cervical headache. *Cephalalgia* 1999;19:179–85. doi: 10.1046/j.1468-2982.1999.1903179.x.

12. Falla DL, Jull GA, Hodges PW. Patients with neck pain demonstrate reduced electromyographic activity of the deep cervical flexor muscles during performance of the craniocervical flexion test. *Spine (Phila Pa 1976)* 2004;29:2108–14. doi: 10.1097/01.brs.0000141170.89317.0e.
13. Calamita SAP, Biasotto-Gonzalez DA, De Melo NC, Fumagalli MA, Amorim CF, de Paula Gomes CAF, Politti F. Immediate effect of acupuncture on electromyographic activity of the upper trapezius muscle and pain in patients with nonspecific neck pain: A Randomized, single-blinded, sham-controlled, crossover study. *J Manipulative Physiol Ther* 2018;41:208–17. doi: 10.1016/j.jmpt.2017.09.006.
14. Ingram LA, Snodgrass SJ, Rivett DA. Comparison of cervical spine stiffness in individuals with chronic nonspecific neck pain and asymptomatic individuals. *J Orthop Sports Phys Ther* 2015;45:162–9. doi: 10.2519/jospt.2015.5711.
15. Taimela S, Takala E-P, Asklöf T, Seppälä K, Parviainen S. Active treatment of chronic neck pain: A prospective randomized intervention. *Spine (Phila Pa 1976)* 2000;25:1021–7. doi: 10.1097/00007632-200004150-00018.
16. Faul F, Erdfelder E, Lang A-G, Buchner A. G\*Power 3: A flexible statistical power analysis program for the social, behavioral, and biomedical sciences. *Behavior Research Methods* 2007;39:175–91. doi: 10.3758/bf03193146.
17. Braun BL. Postural differences between asymptomatic men and women and craniofacial pain patients. *Arch Phys Med Rehabil* 1991;72:653-6. doi: org/10.5555/uri:pii:000399939190208Z
18. Harrison AL, Barry-Greb T, Wojtowicz G. Clinical measurement of head and shoulder posture variables. *J Orthop Sports Phys Ther* 1996;23:353–61. doi: 10.2519/jospt.1996.23.6.353.
19. Ferreira-Valente MA, Pais-Ribeiro JL, Jensen MP. Validity of four pain intensity rating scales. *Pain* 2011;152:2399–404. doi: 10.1016/j.pain.2011.07.005.
20. Pool JJM, Ostelo RWJG, Hoving JL, Bouter LM, de Vet HCW. Minimal clinically important change of the neck disability index and the numerical rating scale for patients with neck pain. *Spine (Phila Pa 1976)* 2007;32:3047–51. doi: 10.1097/BRS.0b013e31815cf75b.
21. Cleland JA, Childs JD, Whitman JM. Psychometric properties of the neck disability index and numeric pain rating scale in patients with mechanical neck pain. *Arch Phys Med Rehabil* 2008;89:69–74. doi: 10.1016/j.apmr.2007.08.126.
22. Weber P, Castilhos E, Correa E, Milanesi J, Soares J, Trevisan M. Craniocervical posture: Cephalometric and biophotogrammetric analysis. *Braz J Oral Sci* 2012;11:416–21. doi: 10.20396/bjos.v11i3.8641399.
23. Ruivo RM, Pezarat-Correia P, Carita AI. Cervical and shoulder postural assessment of adolescents between 15 and 17 years old and association with upper quadrant pain. *Braz J*



- Phys Ther 2014;18:364–71. doi: 10.1590/bjpt-rbf.2014.0027.
24. Lee J, Lee Y, Kim H, Lee J. The effects of cervical mobilization combined with thoracic mobilization on forward head posture of neck pain patients. *J Phys Ther Sci* 2013;25:7–9. doi: 10.1589/jpts.25.7.
  25. Gallego-Izquierdo T, Arroba-Díaz E, García-Ascoz G, Val-Cano MD, Pecos-Martin D, Cano-de-la-Cuerda R. Psychometric proprieties of a mobile application to measure the craniocervical angle a validation and reliability study. *Int J Environ Res Public Health* 2020;17:6521. doi: 10.3390/ijerph17186521.
  26. van Niekerk S-M, Louw Q, Vaughan C, Grimmer-Somers K, Schreve K. Photographic measurement of upper-body sitting posture of high school students: A reliability and validity study. *BMC Musculoskelet Disord* 2008;9:113. doi: 10.1186/1471-2474-9-113.
  27. Kietrys DM, McClure PW, Fitzgerald GK. The relationship between head and neck posture and VDT screen height in keyboard operators. *Phys Ther* 1998;78:395–403. doi: 10.1093/ptj/78.4.395.
  28. Jull GA, O’Leary SP, Falla DL. Clinical assessment of the deep cervical flexor muscles: The craniocervical flexion test. *J Manipulative Physiol Ther* 2008;31:525–33. doi: 10.1016/j.jmpt.2008.08.003.
  29. Fernández-De-Las-Peñas C, Pérez-De-Heredia M, Molero-Sánchez A, Miangolarra-Page JC. Performance of the craniocervical flexion test, forward head posture, and headache clinical parameters in patients with chronic tension-type headache: A pilot study. *J Orthop Sports Phys Ther* 2007;37:33–9. doi: 10.2519/jospt.2007.2401.
  30. Falla D, Jull G, Dall’Alba P, Rainoldi A, Merletti R. An electromyographic analysis of the deep cervical flexor muscles in performance of craniocervical flexion. *Phys Ther* 2003;83:899–906. doi: 10.1093/ptj/83.10.899
  31. Mayoux-Benhamou MA, Revel M, Vallee C. Selective electromyography of dorsal neck muscles in humans. *Exp Brain Res* 1997;113:353–60. doi: 10.1007/BF02450333.
  32. Subbarayalu AV. Measurement of craniocervical angle by the Modified Head Posture Spinal Curvature Instrument: A reliability and validity study. *Physiother Theory Pract* 2016;32:144–52. doi: 10.3109/09593985.2015.1099172.
  33. Kawasaki T, Ohji S, Aizawa J, Sakai T, Hirohata K, Kuruma H, Koseki H, Okawa A, Jinno T. Correlation between the photographic cranial angles and radiographic cervical spine alignment. *Int J Environ Res Public Health* 2022;19:6278. doi: 10.3390/ijerph19106278.
  34. Daffin L, Stuelcken M, Sayers M. Internal and external sagittal craniocervical alignment: A comparison between radiological and photogrammetric approaches in asymptomatic participants. *Musculoskeletal Science and Pract* 2019;43:12–7. doi: 10.1016/j.msksp.2019.05.003.

35. Vasavada AN, Li S, Delp SL. Influence of muscle morphometry and moment arms on the moment-generating capacity of human neck muscles. *Spine (Phila Pa 1976)* 1998;23:412–22. doi: 10.1097/00007632-199802150-00002.
36. Gerr F, Marcus M, Ensor C, Kleinbaum D, Cohen S, Edwards A, Gentry E, Ortiz DJ, Monteilh C. A prospective study of computer users: I. Study design and incidence of musculoskeletal symptoms and disorders. *Am J Ind Med* 2002;41:221–35. doi: 10.1002/ajim.10066.

## Figure Legends

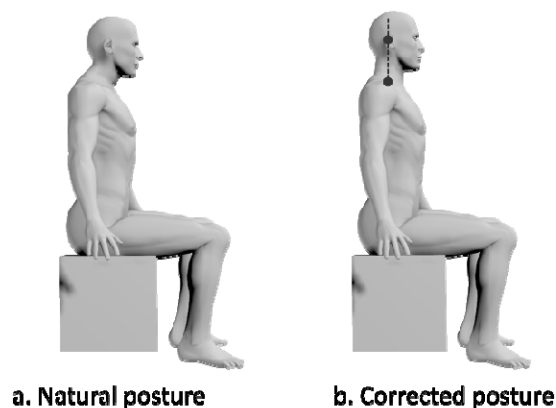

Figure 1. Measurement task

During the measurement task, the patient was seated with the head in the voluntary natural and corrected postures.

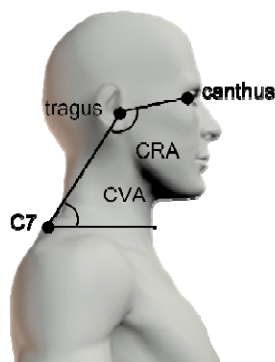

Figure 2. Photographic analysis

The head and neck angles (CRA and CVA) were measured to evaluate the forward head posture using lateral photographs.

CRA, cranial rotation angle; CVA, cranial vertical angle

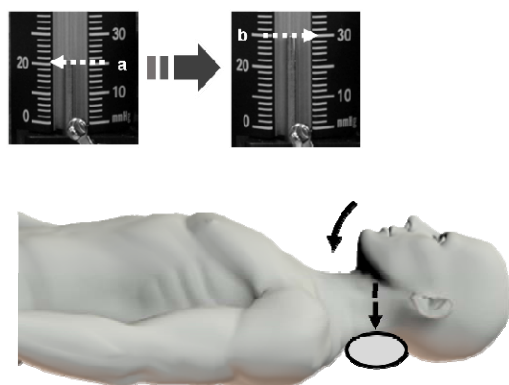

Figure 3. Craniocervical flexion test

The craniocervical flexion test was used to evaluate the activation and endurance of the deep cervical flexors.

(a) stable baseline pressure of 20 mmHg

(b) Five incremental increasing stages (2 mmHg progressive pressure increases from the baseline of 20 mmHg to a maximum of 30 mmHg)

**Table 1. Participant characteristics**

|                              | NSNP group  | Control group |
|------------------------------|-------------|---------------|
| Men:women                    | 2:17        | 10:9          |
| Age (years)                  | 48.0 (13.0) | 36.0 (30.0)   |
| Height (cm)                  | 160.8±6.1   | 165.4±9.9     |
| Weight (kg)                  | 49.0 (7.5)  | 63.0 (13.0)   |
| Body mass index              | 19.3 (1.5)  | 22.9 (1.7)    |
| Numerical rating scale score | 4.0 (3.0)   | 0.0 (0.0)     |

Height is reported as mean±SD

Other data are reported as median (interquartile range)

**Table 2. Comparison of head and neck alignment between patients with NSNP and the control group**

|                                  |     | NSNP       | Control    | <i>P</i> value | Effect size      |
|----------------------------------|-----|------------|------------|----------------|------------------|
| Natural posture                  | CRA | 149.7±5.5  | 151.8±8.6  | 0.39           | d = 0.29         |
|                                  | CVA | 50.6±4.5   | 50.3±4.9   | 0.86           | d = 0.06         |
| Corrected posture                | CRA | 144.1±5.2  | 151.4±8.9  | <b>0.01</b>    | d = 1.00         |
|                                  | CVA | 57.0±4.7   | 51.7±5.1   | <b>0.00</b>    | d = 1.08         |
| Difference (corrected - natural) | CRA | -5.0 (3.8) | -0.1 (4.6) | <b>0.00</b>    | <i>r</i> = -0.59 |
|                                  | CVA | 6.3 (4.3)  | 1.0 (4.9)  | <b>0.00</b>    | <i>r</i> = -0.57 |

Difference CRA and CVA are reported as median (interquartile range)

Other data are reported as mean±SD.

**Table 3. Comparison of head and neck alignment between natural and corrected**

**head postures**

|         |     | Natural   | Corrected | <i>P</i> value | Effect size |
|---------|-----|-----------|-----------|----------------|-------------|
| NSNP    | CRA | 149.7±5.5 | 144.1±5.2 | <b>0.00</b>    | d = 1.05    |
|         | CVA | 50.6±4.5  | 57.0±4.7  | <b>0.00</b>    | d = 1.39    |
| Control | CRA | 151.8±8.6 | 151.4±8.9 | 0.70           | d = 0.05    |
|         | CVA | 50.3±4.9  | 51.7±5.1  | 0.08           | d = 0.28    |

**Table 4. Comparison of function of deep cervical flexor muscles in NSNP and control groups**

|                       | NSNP      | Control   | <i>P</i> value | Effect size |
|-----------------------|-----------|-----------|----------------|-------------|
| Active pressure score | 5.0 (5.0) | 6.0 (3.0) | 0.02           | $r = -0.39$ |
| Performance index     | 37.5±23.8 | 61.3±22.2 | 0.00           | $d = 1.03$  |



**Table 5. Relationship between the degree of change from natural to corrected head postures and the function of deep cervical flexor muscles**

|                       | All   |                    | NSNP  |                    | Control |       |
|-----------------------|-------|--------------------|-------|--------------------|---------|-------|
|                       | D-CRA | D-CVA              | D-CRA | D-CVA              | D-CRA   | D-CVA |
| Active pressure score | 0.49* | -0.40 <sup>†</sup> | 0.60* | -0.54 <sup>†</sup> | 0.25    | 0.24  |
| Performance index     | 0.49* | -0.23              | 0.76* | -0.33              | -0.01   | 0.42  |

\*\* <0.01, <sup>†</sup> <0.05

D, Difference (corrected-natural)
